# Supplementary material for: A work-function tunable polyelectrolyte complex (PEI:PSS) as a cathode interfacial layer for inverted organic solar cells
Source: Royal Society of Chemistry journal article supplement (doi:10.1039/c4ta00289j), 2014-01-01
Supplement: c4ta00289j1.pdf [file c4ta00289j1.pdf]

Supporting Information for

**Work-function tunable Polyelectrolyte Complex (PEI:PSS) as the Interfacial Layer for  
Inverted Organic Solar Cells**

Zhenhua Lin,<sup>a</sup> Jingjing Chang,<sup>b</sup> Jie Zhang,<sup>c</sup> Changyun Jiang,<sup>\*c</sup> Jishan Wu,<sup>b,c\*</sup> and Chunxiang  
Zhu<sup>a\*</sup>

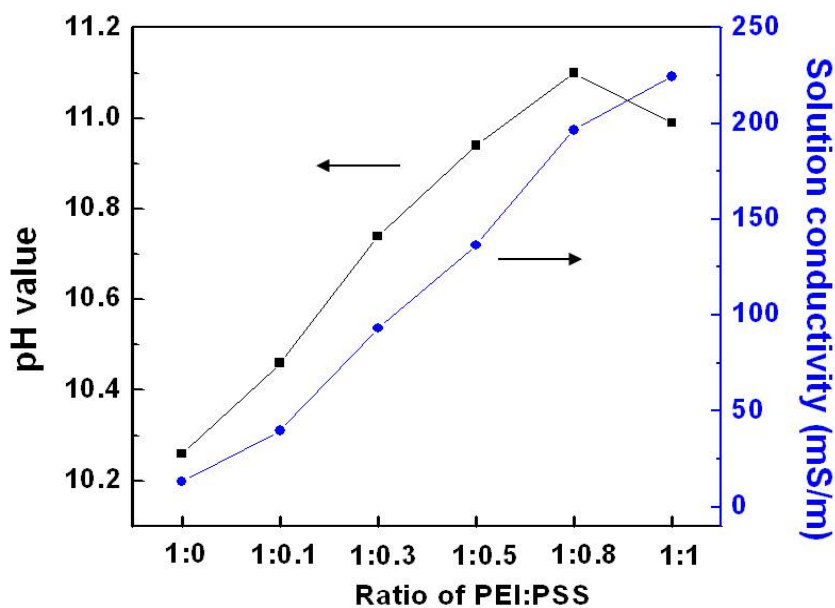

**Fig. S1.** The pH value and conductivity of the PEI:PSS solutions as a function of the PEI:PSS ratios.

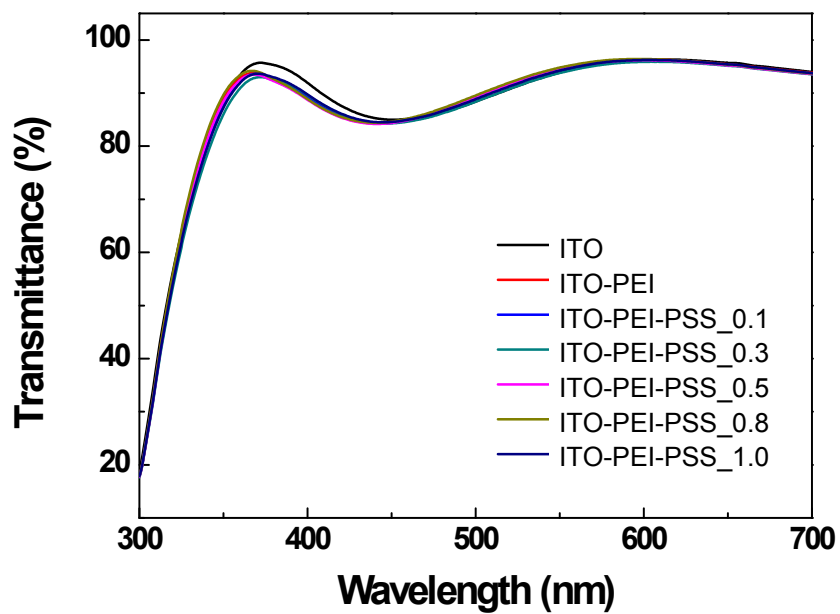

**Fig. S2.** Transmittance spectra of ITO, ITO/PEI and ITO/PEI:PSS films on glass substrates.

(a) ITO-PEI, RMS = 2.41 nm

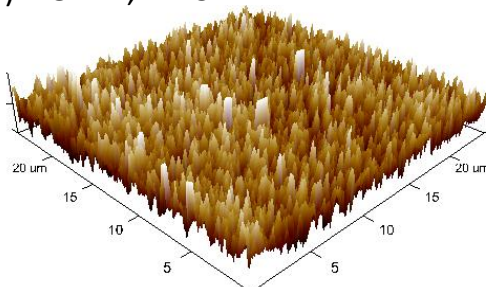

(b) ITO-PEI-0.1, RMS = 1.71 nm

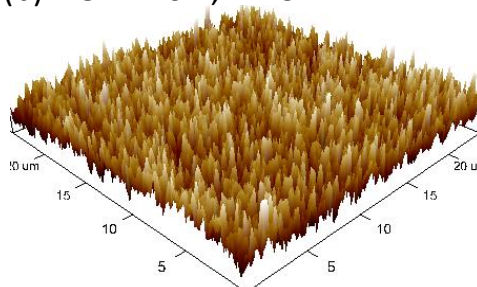

(c) ITO-PEI-0.3, RMS = 1.65 nm

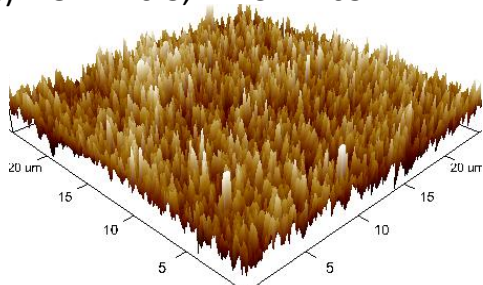

(d) ITO-PEI-0.5, RMS = 1.92 nm

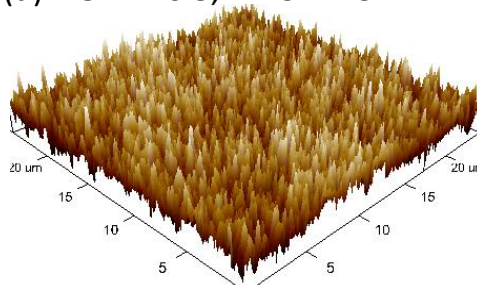

(e) ITO-PEI-0.8, RMS = 2.39 nm

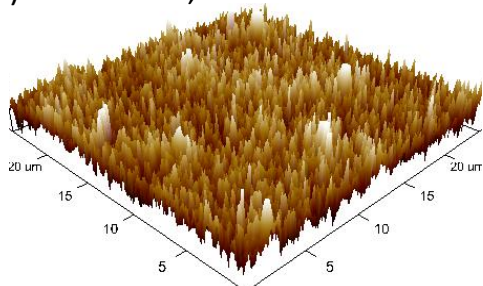

(f) ITO-PEI-1.0, RMS = 2.17 nm

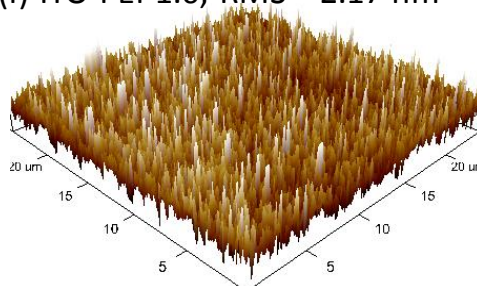

**Fig. S3.** AFM images of the ITO glass substrates covered with PEI (a), PEI:PSS with ratios of 1:0.1 (b), 1:0.3 (c), 1:0.5 (d), 1:0.8 (e) and 1:1 (f).

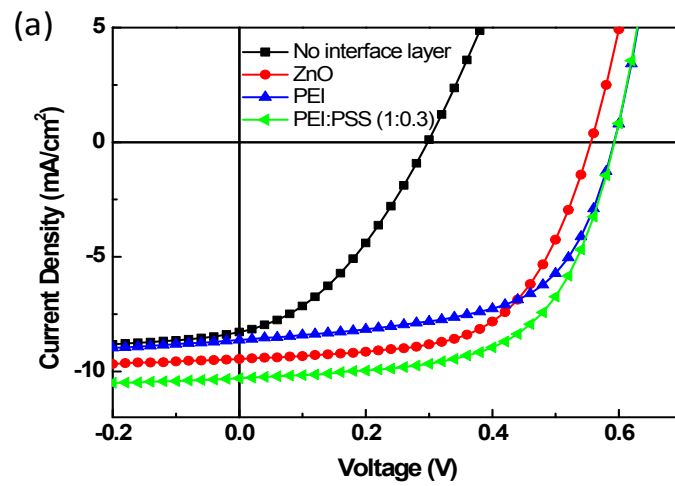

**Fig. S4.**  $J - V$  characteristics of inverted P3HT:PC<sub>61</sub>BM solar cells with different interface layers.

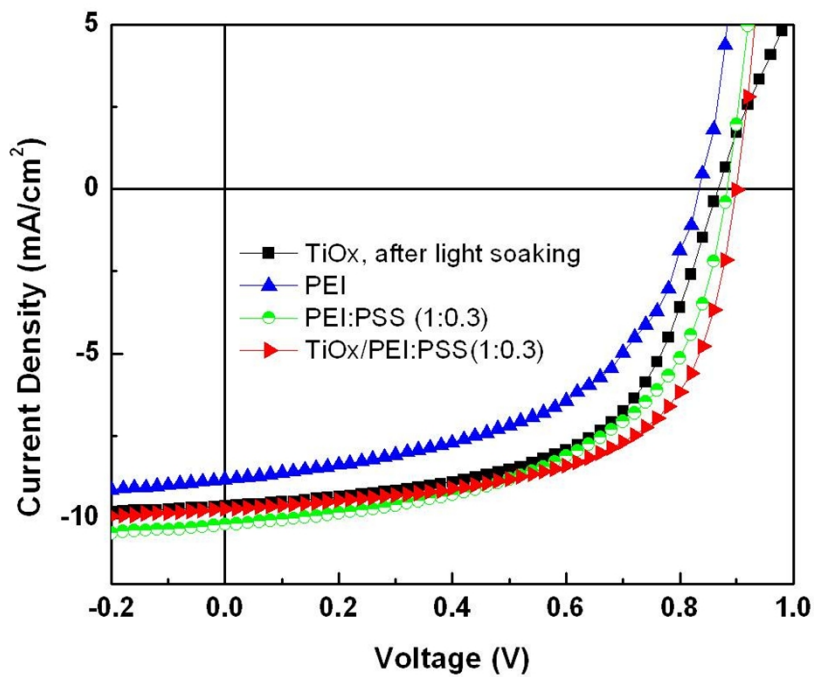

**Fig. S5.**  $J - V$  characteristics of inverted PCDTBT:PC<sub>71</sub>BM solar cells with TiO<sub>x</sub> (with light soaking), PEI, PEI:PSS(1:0.3) and TiO<sub>x</sub>/PEI:PSS (1:0.3) interfacial layers.

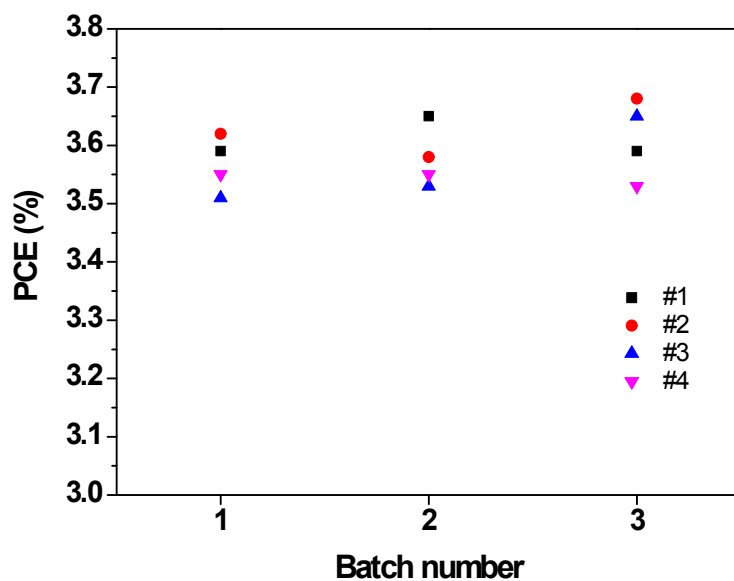

**Fig. S6.** Batch-to-batch and device-to-device variations of the PCEs ( $\eta$ ) of the P3HT:PC<sub>60</sub>BM solar cells with ITO/PEI:PSS (1:0.3) cathode. For each batch, four devices (#1, #2, #3 and #4) were measured. The variations are in reasonable small range ( $\leq 5\%$ ).
